# Supplementary material for: Healthcare Expenditure Prediction with Neighbourhood Variables – A Random Forest Model
Source: publisher site journal article supplement (doi:10.1515/spp-2019-0010), 2020-09-30
Supplement: Supplementary file 1 [file j_spp-2019-0010_suppl.docx]

**Appendices**

## Appendix A: Hospital catchment areas in the Netherlands


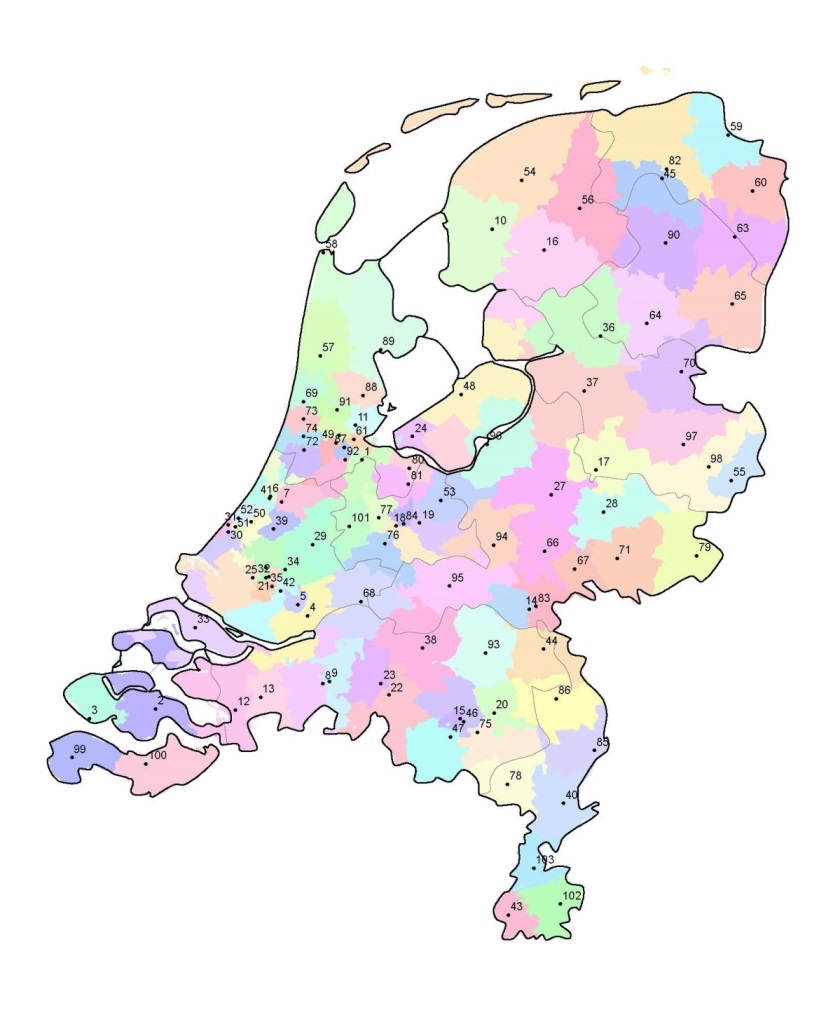
Figure Supplementary file A: Postal codes clustered in hospital catchment areas (nearest hospital). Nearest is defined as the shortest distance between de center of the postcode and the center of the postcode of the hospital. We only used Dutch hospitals which deliver 24 hour basic secondary care (Made by RIVM).

Table Supplementary file A. Comparison hospital catchment area with the Netherlands (2017 data)

|  | The Netherlands | Hospital catchment area | | | |
| --- | --- | --- | --- | --- | --- |
| N | Mean | St. Dev | Min | Max |
| Inhabitants | 17,081,507 | 165,735 | 66,293 | 25,285 | 388,945 |
| Neighborhoods† | 13,208 | 127.7 | 64.5 | 14 | 353 |
| Hospitals | 103 | 1 | NA | NA | NA |

†Neighborhoods refer to Statistics Netherlands neighborhood codes (in Dutch CBS buurten).

## Appendix B: Variables used in this study

| **Socio-demographic and neighborhood variables** | | | |
| --- | --- | --- | --- |
| **Data source** | **Original variable** | **New name of variable** | **Background information** |
|  | Rinpersoon  Rinpersoons | Person_id† | Two variables are needed to identify a person. |
| VSLGWBTAB2015V2 | Bc2008 | Neighborhood_pre† | The neighborhood before the move. |
| VSLGWBTAB2015V2 | Bc2010 | Neighborhood_post† | The neighborhood after the move. |
| Of i | Neighborhood_pre = neighborhood_post | Moved_within_neighborhood | 1 = yes. The new neighborhood is physically the same as the new neighborhood. We only used neighborhood_pre codes. Otherwise, changes in neighborhood codes might have introduced mistakes. |
| cbs_buurt_2008_centroide |  | x_coord_pre | X-coordinate of neighborhood_pre. |
| cbs_buurt_2008_centroide |  | y_coord_pre | Y-coordinate of neighborhood_pre. |
| cbs_buurt_2010_centroide |  | x_coord_post | X-coordinate of neighborhood_post. |
| cbs_buurt_2010_centroide |  | y_coord_post | Y-coordinate of neighborhood_post. |
| Leefbarometer 2008 | LBscore | Livability_08_pre | Livability of neighborhood_pre in the year 2008. |
| Leefbarometer 2008 | LBscore | Livability_08_post | Livability of neighborhood_post in the year 2008. |
| bagsloop_neco_20102012 | sloopdatum | Pre_house_demolished | 1= yes. The house before the move was demolished, which might have been the only reason to move. |
| GBAhuishoudensbus | datumaanvangHH  datumeindehh  huishoudnr | Household_code03†  Household_code04†  Household_code05†  Household_code06†  Household_code07†  Household_code08†  Household_code09 †  Household_code10†  Household_code11†  Household_code12†  Household_code13†  Household_code14† | A person is always part of a household (even when he or she is the only person in the household). We need this variable to link household information to the personal level. Per person, one household code per year was chosen (reference data was 31 Dec. of a year). |
|  | Person_id  Household_code | Household_code05_09 | This variable concatenates all household codes of the year 2005 to 2009.  This variable is needed to select only one person with the same household-history. |
| GBAhuishoudensbus | typhh | Household_type03 Household_type04  Household_type05  Household_type06  Household_type07  Household_type08  Household_type09  Household_type10  Household_type11  Household_type12  Household_type13  Household_type14 | Type of household (1-8):  1 = One-person household  2 = Unmarried couple, no children  3 = Married couple, no children  4 = Unmarried couple with child(ren)  5 = Married couples with child(ren)  6 = Single parent household  7 = Other  8 = Persons in institutional households |
| GBAhuishoudensbus | PLHH | Position_in_household03  Position_in_household04  Position_in_household05  Position_in_household06  Position_in_household07  Position_in_household08  Position_in_household09  Position_in_household10  Position_in_household11  Position_in_household12  Position_in_household13  Position_in_household14 | The position of the person in a household (1-10):  1 = Child living at home  2 = Single  3 = Not married without children  4 = Married without children  5 = Not married with children  6 = Married with children  7 = Single parent  8 = No position (because of being a member of another household)  9 = Other member of household  10 = Persons in institutional households |
| Integraal huishoudens inkomen | Bvrgestinkh | Household_income03  Household_income04  Household_income05  Household_income06  Household_income07  Household_income08  Household_income09  Household_income10  Household_income11  Household_income12  Household_income13  Household_income14 | Annual household income; standardized for number and age of household members. |
| Integraal huishoudens inkomen | BVRSOORTHH  BVRSRTADR | HH_is_nursing_home_elderly03  HH_is_nursing_home_elderly_04  HH _is_nursing_home_elderly_05  HH _is_nursing_home_elderly_06  HH _is_nursing_home_elderly_07  HH _is_nursing_home_elderly_08  HH _is_nursing_home_elderly_09  HH _is_nursing_home_elderly_10  HH _is_nursing_home_elderly_11  HH _is_nursing_home_elderly_12  HH _is_nursing_home_elderly_13  HH _is_nursing_home_elderly_14 | Person lives in an institution for elderly. |
| Integraal huishoudens inkomen | BVREHALG | Rental_house_03  Rental_house_04  Rental_house_05  Rental_house_06  Rental_house_07  Rental_house_08  Rental_house_09  Rental_house_10  Rental_house_11  Rental_house_12  Rental_house_13  Rental_house_14 | Person lives in:  1= own house  2= rented house with rent benefit  3= rented house without rent benefit |
| GBApersoontab2015v1 | GBAGEBOORTEJAAR GBAGEBORTEMAAND | age_at_move | Age (in years) at reference date 31-12-2010. |
| GBApersoontab2015v1 | GBAGESLACHT | SEX_at_move | Gender:  1= male  2 = female  Missings are also female (CBS rule) |
| GBApersoontab2015v1 | GBAGENERATIE | Ethnic_background | Ethnic background:  1 = Native  2 = 1st generation non-native  3 = 2nd generation non-native |
| GBAburgerlijkestaatbus 2015 | gbaaanvangburgerlikestaat | Married_03  Married_04  Married_05  Married_06  Married_07  Married_08  Married_09  Married_10  Married_11  Married_12  Married_13  Married_14 | Civil wedding:  1 = married (at least once) in that particular year  0 = did not get married in that particular year |
| GBAburgerlijkestaatbus 2015 | gbaeindeburgerlijkestaat | Divorced_03  Divorced_04  Divorced_05  Divorced_06  Divorced_07  Divorced_08  Divorced_09  Divorced_10  Divorced_11  Divorced_12  Divorced_13  Divorced_14 | Divorce:  1 = got divorced (at least once) in that particular year  0 = did not divorce in that particular year |
| GBAburgerlijkestaatbus 2015 | GBAAANVANGBURGERLIJKESTAAT | Marital_status_03  Marital_status_04  Marital_status_05  Marital_status_06  Marital_status_07  Marital_status_08  Marital_status_09  Marital_status_10  Marital_status_11  Marital_status_10  Marital_status_12  Marital_status_13  Marital_status_14 | Marital status in that particular year:  1 = single.  2 = married or registered partner.  3 = divorced  4 = widow  We chose the marital status that was valid on most days of the year. |
| Kindouder2015TABv2 | Rinpersoon  Rinpersoonpa  rinpersoonma | Children_03  Children_04  Children_05  Children_06  Children_07  Children_08  Children_09  Children_10  Children_11  Children_12  Children_13  Children_14 | Number of children (of all ages) in that particular year.  The parent does not have to be the biological parent. We count the children related to the parent by law.  Irrespective of the age of the children and whether they are still alive. |
| Kindouder2015TABv2 |  | New_child_03  New_child_04  New_child_05  New_child_06  New_child_07  New_child_08  New_child_09  New_child_10  New_child_11  New_child_12  New_child_13  New_child_14  New_child_15 | Number of newborn children in that particular year.  Reading example: 2 = a person is father of twins; or a person got one child in the spring and one in the winter; Or a person is the partner of two different women, both giving birth to each one child. |
| INTEGRAAL PERSOONLIJK INKOMEN | SECCOAL1 | occupation_03  occupation_04  occupation_05  occupation_06  occupation_07  occupation_08  occupation_09  occupation_10  occupation_11  occupation_12  occupation_13  occupation_14  occupation_15 | Persons’ socio-economic position:  001=Employed in private sector  002=Employed in public office  003=Manager, company owner  004=Self-employed  005=Other occupation  006=Recipient of unemployment benefits  007=Recipient of social welfare  008=Recipient of other sorts of benefits  009=Recipient of benefits due to incapable of work  010= Pensioner <65 years of age  011= Pensioner ≥65 years of age  012= Student  013= No occupation  014= No information/ no income |
| INTEGRAAL_VERMOGENSBESTAND | bvrw1121won | Value_of_house_06  Value_of_house_07  Value_of_house_08  Value_of_house_09  Value_of_house_10  Value_of_house_11  Value_of_house_12  Value_of_house_13  Value_of_house_14  Value_of_house_15 | The value (in Euro) of the house the person owns and lives in. |
| INTEGRAAL_VERMOGENSBESTAND | bvrw1220sov | Non_mortgage_debt_06  Non_mortgage_debt_07  Non_mortgage_debt_08  Non_mortgage_debt_09  Non_mortgage_debt_10  Non_mortgage_debt_11  Non_mortgage_debt_12  Non_mortgage_debt_13  Non_mortgage_debt_14  Non_mortgage_debt_15 | Non-mortgage debt of the household. |
| INTEGRAAL_VERMOGENSBESTAND | percvermogen | Household_asset_percentile_06  Household_asset_percentile_07  Household_asset_percentile_08  Household_asset_percentile_09  Household_asset_percentile_10  Household_asset_percentile_11  Household_asset_percentile_12  Household_asset_percentile_13  Household_asset_percentile_14  Household_asset_percentile_15 | Percentile of asset of the household. All households were ordered by asset (in euros) and divided in 100 groups. |
| Adherentiegebieden_hospital31juli2017_short |  | xcoord_hospital_pre† | X-coordinate of the center of the postcode of the nearest hospital before move. |
|  |  | ycoord_hospital_pre† | Y-coordinate of the center of the postcode of the nearest hospital before move. |
| Adherentiegebieden_hospital31juli2017_short |  | xcoord_hospital_post † | X-coordinate of the center of the postcode of the nearest hospital after move. |
|  |  | ycoord_hospital_post† | Y-coordinate of the center of the postcode of the nearest hospital after move. |
| Adherentiegebieden_hospital31juli2017_short |  | Moved_within_hospital_c_area† | Person has moved within the hospital catchment area. |
| GBAHH_IPI_IHI_en_IVP | GBADATUM overlijden | Year_of_death | Whether a person died |

†This variable was not used as prediction variable. This variable was necessary during the preparation phase to link data.

| Healthcare utilization and costs | | | |
| --- | --- | --- | --- |
| Data source | Original variable | Name of variable | Background information |
| ATC MEDICIJNTAB2015V1† | ATC4 | Sum_ATC4_06  Sum_ATC4_07  Sum_ATC4_08  Sum_ATC4_09  Sum_ATC4_10  Sum_ATC4_11  Sum_ATC4_12  Sum_ATC4_13  Sum_ATC4_14  Sum_ATC4_15 | Annual medication use (all medication distributed by pharmacy outside the hospital and covered by the health insurance) per ATC4 group.  Reading example:  0 = no medication distributed by pharmacy outside the hospital. Medication might be payed out-of-pocket or received in a hospital.  1 = In a particular year at least one time a medication of one ATC4 group is distributed to the person.  2 = The person has received medication from two different ATC4 groups.  The variable gives no information on how much/many a person received (and consumed) of a particular ATC4 group. The variable gives an indication of comorbidity. |
| ATC MEDICIJNTAB2015V1 | ATC4 | ATC_A_06  ATC_A_07  ATC_A_08  ATC_A_09  ATC_A_10  ATC_A_11  ATC_A_12  ATC_A_13  ATC_A_14  ATC_A_15 | Used medication from: ATC group “A” Alimentary tract and metabolism |
| ATC MEDICIJNTAB2015V1 | ATC4 | ATC_B_06  ATC_B_07  ATC_B_08  ATC_B_09  ATC_B_10  ATC_B_11  ATC_B_12  ATC_B_13  ATC_B_14  ATC_B_15 | Used medication from: ATC group “B” Blood and blood forming organs |
| ATC MEDICIJNTAB2015V1 | ATC4 | ATC_C_06  ATC_C_07  ATC_C_08  ATC_C_09  ATC_C_10  ATC_C_11  ATC_C_12  ATC_C_13  ATC_C_14  ATC_C_15 | Used medication from: ATC group “C” Cardiovascular system |
| ATC MEDICIJNTAB2015V1 | ATC4 | ATC_D_06  ATC_D_07  ATC_D_08  ATC_D_09  ATC_D_10  ATC_D_11  ATC_D_12  ATC_D_13  ATC_D_14  ATC_D_15 | Used medication from: ATC group “D” Dermatologicals |
| ATC MEDICIJNTAB2015V1 | ATC4 | ATC_G_06  ATC_G_07  ATC_G_08  ATC_G_09  ATC_G_10  ATC_G_11  ATC_G_12  ATC_G_13  ATC_G_14  ATC_G_15 | Used medication from: ATC group “G” Genito urinary system and sex hormones |
| ATC MEDICIJNTAB2015V1 | ATC4 | ATC_H_06  ATC_H_07  ATC_H_08  ATC_H_09  ATC_H_10  ATC_H_11  ATC_H_12  ATC_H_13  ATC_H_14  ATC_H_15 | Used medication from: ATC group “H” Systemic hormonal preparations. excl. sex hormones and insulins |
| ATC MEDICIJNTAB2015V1 | ATC4 | ATC_J_06  ATC_J_07  ATC_J_08  ATC_J_09  ATC_J_10  ATC_J_11  ATC_J_12  ATC_J_13  ATC_J_14  ATC_J_15 | Used medication from: ATC group “J” Antiinfectives for systemic use |
| ATC MEDICIJNTAB2015V1 | ATC4 | ATC_L_06  ATC_L_07  ATC_L_08  ATC_L_09  ATC_L_10  ATC_L_11  ATC_L_12  ATC_L_13  ATC_L_14  ATC_L_15 | Used medication from: ATC group “L” Antineoplastic and immunomodulating agents |
| ATC MEDICIJNTAB2015V1 | ATC4 | ATC_M_06  ATC_M_07  ATC_M_08  ATC_M_09  ATC_M_10  ATC_M_11  ATC_M_12  ATC_M_13  ATC_M_14  ATC_M_15 | Used medication from: ATC group “M” Musculo-skeletal system |
| ATC MEDICIJNTAB2015V1 | ATC4 | ATC_N_06  ATC_N_07  ATC_N_08  ATC_N_09  ATC_N_10  ATC_N_11  ATC_N_12  ATC_N_13  ATC_N_14  ATC_N_15 | Used medication from: ATC group “N” Nervous system |
| ATC MEDICIJNTAB2015V1 | ATC4 | ATC_P_06  ATC_P_07  ATC_P_08  ATC_P_09  ATC_P_10  ATC_P_11  ATC_P_12  ATC_P_13  ATC_P_14  ATC_P_15 | Used medication from: ATC group “P” Antiparasitic products. insecticides and repellents |
| ATC MEDICIJNTAB2015V1 | ATC4 | ATC_R_06  ATC_R_07  ATC_R_08  ATC_R_09  ATC_R_10  ATC_R_11  ATC_R_12  ATC_R_13  ATC_R_14  ATC_R_15 | Used medication from: ATC group “R” Respiratory system |
| ATC MEDICIJNTAB2015V1 | ATC4 | ATC_S_06  ATC_S_07  ATC_S_08  ATC_S_09  ATC_S_10  ATC_S_11  ATC_S_12  ATC_S_13  ATC_S_14  ATC_S_15 | Used medication from: ATC group “S” Sensory organs |
| ATC MEDICIJNTAB2015V1 | ATC4 | ATC_V_06  ATC_V_07  ATC_V_08  ATC_V_09  ATC_V_10  ATC_V_11  ATC_V_12  ATC_V_13  ATC_V_14  ATC_V_15 | Used medication from: ATC group “V” Various (WHO. p. 48) |
| ATC MEDICIJNTAB2015V1 | ATC4 IN (N05B  N05C  N06A  N06B) | ATC_N05B_N05C_N06A_ N06B_06  ATC_N05B_N05C_N06A_ N06B_07  ATC_N05B_N05C_N06A_ N06B_08  ATC_N05B_N05C_N06A_ N06B_09  ATC_N05B_N05C_N06A_ N06B_10  ATC_N05B_N05C_N06A_ N06B_11  ATC_N05B_N05C_N06A_ N06B_12  ATC_N05B_N05C_N06A_ N06B_13  ATC_N05B_N05C_N06A_ N06B_14  ATC_N05B_N05C_N06A_ N06B_15 | Used calming and arousing drugs to treat mental health problems (high prevalence medication):  - Psycholeptics (calming drugs).  N05B anxiolytics  N05C hypnotics en sedatives  N06B Psychostimulantia (includes ADHD-medication)  - Psychoanaleptics (arousing drugs)  N06A antidepressants |
| ATC MEDICIJNTAB2015V1 | ATC4 = A10B | ATC_A10B_06  ATC_A10B_07  ATC_A10B_08  ATC_A10B_09  ATC_A10B_10  ATC_A10B_11  ATC_A10B_12  ATC_A10B_13  ATC_A10B_14  ATC_A10B_15 | Used drugs for diabetes type 2: A10B Blood glucose lowering drugs. excluding insulins |
| ATC MEDICIJNTAB2015V1 | ATC4 = R03 | ATC_R03_06  ATC_R03_07  ATC_R03_08  ATC_R03_09  ATC_R03_10  ATC_R03_11  ATC_R03_12  ATC_R03_13  ATC_R03_14  ATC_R03_15 | Used: R03 Drugs for obstructive airway diseases |
| necoc_Zk2008_fin (of necoc_neco_zk08) | Som van variabelen  HuisartsInschrijftarief.. t/m  … overigeKostenGGZ | Total_cost_08 | The sum of all expenditures covered by the health insurance act per person per year |
|  | Total_cost_08 – mental_healthcare_cost_08 | Cost_regular_healthcare_08 | The sum of all expenditures covered by the health insurance act (minus intramural mental healthcare costs) |
| Zk2008_fin | huisartsconsult | GP_consultation_cost08 | Costs for consult with general practitioner (GP) (no other GP costs) |
| Zk2008_fin | Huisartsinschrijftarief  huisartsoverig | Other_GP_cost08 | Total sum of rest of GP costs. |
| Zk2008_fin Zk2008_fin | farmacietotaal | Medical_cost08 | Pharmaceuticals (prescribed medicines distributed outside hospital) |
| Zk2008_fin | mondzorgtotaal | Dentalcare_cost08 |  |
| Zk2008_fin | Verloskundigezorg  kraamzorgtotaal | Primary_maternitycare_cost08 |  |
| Zk2008_fin | ziekenhuiszorgtotaal | Specialistcare _cost08 | Total sum of hospital-based specialist care expenses per year per person |
| Zk2008_fin | Fysiotherapie  ParamedischeKostenOverig | Alliedcare_cost08 | Total sum of costs for allied healthcare (such as physiotherapist. dieticians and speech therapists) per person |
| Zk2008_fin | hulpmiddelentotaal | Medical_aids_costs08 | Total sum of costs for medical aids (seeing eye-doctor) per person |
| Zk2008_fin | ziekenvervoerZittend | Health_transport_sede_cost08 | Total sum of costs for health transports while patient was sitting, per person in year 2008 |
| Zk2008_fin | ziekenvervoerliggend | Health_transport_hori_cost08 | Total sum of costs for health transports while patient was lying, per person in year 2008 |
| Zk2008_fin | BuitenlandGrensoverschrijdend | Health_care_abroad_cost08 | Total sum of other healthcare costs abroad covered by health insurance act |
| Zk2008_fin | EerstelijnspsychologischezorgBedrag,  KostenDBCssggzmet-verblijf KostenInstellingen_DBCsGGZZonderVerblijf  KostenZelfsstandiggevestigden_dbcsgggzzonderverblijf  OverigeKostenGGZ | Mental_healthcare_cost08 | Total sum of mental healthcare costs |
| Zk2008_fin | EigenRisico | Deductible08 | Deductible: the amount of money that should be paid out of pocket by the patient before an insurance company will pay any expenses” |
| ZVWzorgkostentab 2009TABV1 t/m 2014 | Som van  ZVWkhuisarts…..zvwkwykverpleging | Total_cost_09  Total_cost_10  Total_cost_11  Total_cost_12  Total_cost_13  Total_cost_14 | The sum of all expenditures covered by the health insurance act per person per year  Variable names for 2009 to 2014 are different from 2008. |
|  | Total_cost_year– mental_healthcare_cost_year | Cost_regular_healthcare_09  Cost_regular_healthcare_10  Cost_regular_healthcare_11  Cost_regular_healthcare_12  Cost_regular_healthcare_13  Cost_regular_healthcare_14 | The sum of all expenditures covered by the health insurance act (minus intramural mental healthcare costs) |
| ZVWzorgkostentab 2009TABV1 t/m 2014 | NOPzvwkhuisartsconsult | GP_consultation_cost09  GP_consultation_cost10  GP_consultation_cost11  GP_consultation_cost12  GP_consultation_cost13  GP_consultation_cost14 | Costs for consult with general practitioner (GP) (no other GP costs) |
| ZVWzorgkostentab 2009TABV1 t/m 2014 | NOPZVWKHuisartsinschrijf  NOPZVWKhuisartsoverig | Other_GP_cost09  Other_GP_cost10  Other_GP_cost11  Other_GP_cost12  Other_GP_cost13  Other_GP_cost14 | Total sum of rest of GP costs. |
| ZVWzorgkostentab 2009TABV1 t/m 2014 | ZVWKfarmacie | Medical_cost09  Medical_cost10  Medical_cost11  Medical_cost12  Medical_cost13  Medical_cost14 | Pharmaceuticals (prescribed medicines distributed outside hospital) |
| ZVWzorgkostentab 2009TABV1 t/m 2014 | ZVWKmondzorg | Dentalcare_cost09  Dentalcare_cost10  Dentalcare_cost11  Dentalcare_cost12  Dentalcare_cost13  Dentalcare_cost14 |  |
| ZVWzorgkostentab 2009TABV1 t/m 2014 | NOPZVWKVerloskunde  NOPZVWKkraamzorg | Primary_maternitycare_cost09  Primary_maternitycare_cost10  Primary_maternitycare_cost11  Primary_maternitycare_cost12  Primary_maternitycare_cost13  Primary_maternitycare_cost14 |  |
| ZVWzorgkostentab 2009TABV1 t/m 2014 | ZVWKziekenhuis | Specialistcare _cost09  Specialistcare _cost10  Specialistcare _cost11  Specialistcare _cost12  Specialistcare _cost13  Specialistcare _cost14 | Total sum of hospital-based specialist care expenses per year per person |
| ZVWzorgkostentab 2009TABV1 t/m 2014 | ZVWKParamedisch | Alliedcare_cost09  Alliedcare_cost10  Alliedcare_cost11  Alliedcare_cost12  Alliedcare_cost13  Alliedcare_cost14 | Total sum of costs for allied healthcare (such as physiotherapist. dieticians and speech therapists) per person |
| ZVWzorgkostentab 2009TABV1 t/m 2014 | ZVWKhulpmiddel | Medical_aids_costs09  Medical_aids_costs10  Medical_aids_costs11  Medical_aids_costs12  Medical_aids_costs13  Medical_aids_costs14 | Total sum of costs for medical aids (seeing eye-doctor) per person |
| ZVWzorgkostentab 2009TABV1 t/m 2014 | NOPZVWKziekenvervoerZit | Health_transport_sede_cost09  Health_transport_sede_cost10  Health_transport_sede_cost11  Health_transport_sede_cost12  Health_transport_sede_cost13  Health_transport_sede_cost14 | Total sum of costs for health transports while patient was sitting, per person in year 2008 |
| ZVWzorgkostentab 2009TABV1 t/m 2014 | NOPZVWKziekenvervoerlig | Health_transport_hori_cost09  Health_transport_hori_cost10  Health_transport_hori_cost11  Health_transport_hori_cost12  Health_transport_hori_cost13  Health_transport_hori_cost14 | Total sum of costs for health transports while patient was lying, per person in year 2008 |
| ZVWzorgkostentab 2009TABV1 t/m 2014 | ZVWbuitenland | Health_care_abroad_cost09  Health_care_abroad_cost10  Health_care_abroad_cost11  Health_care_abroad_cost12  Health_care_abroad_cost13  Health_care_abroad_cost14 | Total sum of other healthcare costs abroad covered by health insurance act |
| ZVWzorgkostentab 2009TABV1 t/m 2014 | ZVWKGGZ | Mental_healthcare_cost09  Mental_healthcare_cost10  Mental_healthcare_cost11  Mental_healthcare_cost12  Mental_healthcare_cost13  Mental_healthcare_cost14 | Total sum of mental healthcare costs |

† In ATC system, the active substances are divided into different groups according to the organ or system on which they act and their therapeutic, pharmacological and chemical properties.” WHO, 2017, p.15. ATC categories can be found here: https://www.whocc.no/atc/structure_and_principles/

## Appendix C: Subgroup definition

Subgroup ‘Diabetes type 2’: People with ATC A10B Blood glucose lowering drugs. Medication for diabetes type 2 patients, excluding insulins, in
year 2009. N = 9496.

Subgroup ‘Mental health disease’: People with calming and arousing drugs to treat mental health problems (high prevalence medication) in year 2009. (Psycholeptics (calming drugs). N05B anxiolytics, N05C hypnotics and sedatives, N06B Psychostimulantia (waaronder ADHD-medicatie), Psychoanaleptics (arousing drugs), N06A antidepressants). N = 20337.

Subgroup ‘Obstructive airway disease’: People with drugs for obstructive airway diseases (ATC code R03). ATC code R03 includes: R03A Adrenergics, inhalants; R03B other drugs for obstructive airway disease, inhalants; R03C Adrenergics for systemic use R03D other systemic drugs for obstructive airway diseases. N = 20124.

## Appendix D: Comparison study population (and subpopulations) with the Dutch population on socio-demographic information in 2009

| Variables (year 2009) | | NL population N= 16,485,787 | Study population  N = 208,399 | Subgroup: Diabetes type 2  N=9496 | Subgroup: Mental health disease†  N=20,337 | Subgroup: Obstructive airway disease  N=20,124 |
| --- | --- | --- | --- | --- | --- | --- |
| Mean/% | Mean (Std. Dev.) / % | Mean (Std. Dev.) / % | Mean (Std. Dev.) / % | Mean (Std. Dev.) / % |
| Age | | 39.9 | 43.1 (23.1) | 72.7 (13.2) | 56.3 (22.5) | 52.3 (24.7) |
| Male | | 49.5 | 48.3 | 39.4 | 34.4 | 40.8 |
| Mortality (2011)‡ | | 0.8 | 2.5 | 8.9 | 5.7 | 5.4 |
| Ethnic background‡ | Native | 80.1 | 82.9 | 81.8 | 85.1 | 83.9 |
| First generation non-native | 10.1 | 7.4 | 12.9 | 8.5 | 7.4 |
| Second generation non-native | 9.9 | 9.7 | 5.3 | 6.4 | 8.8 |
| Marital status‡ | Single | 46.6 | 56.3 | 10.1 | 33.2 | 39.6 |
| Married or registered partner | 41.8 | 25.0 | 38.6 | 30.4 | 29.8 |
| Divorced | 6.4 | 7.6 | 13.0 | 13.7 | 11.3 |
| Widow | 5.3 | 11.2 | 38.4 | 22.7 | 19.3 |
| Occupation§ | Employed in private sector | 54.2 | 41.5 | 9.1 | 24.3 | 29.8 |
| Employed in public office | 6.2 | 3.4 | 1.1 | 2.1 | 2.2 |
| Manager, company owner | 1.7 | 1.0 | 0.5 | 0.4 | 0.6 |
| Self-employed | 8.0 | 5.4 | 2.7 | 3.1 | 3.6 |
| Other occupation | 1.3 | 0.5 | 0.3 | 0.6 | 0.5 |
| Recipient of unemployment benefits | 1.2 | 0.7 | 0.7 | 1.0 | 0.7 |
| Recipient of social welfare | 2.8 | 2.1 | 3.3 | 5.3 | 3.2 |
| Recipient of other sorts of benefits | 1.0 | 2.0 | 1.2 | 4.0 | 1.6 |
| Recipient of benefits due to incapable of work | 4.0 | 2.8 | 5.1 | 10.8 | 5.1 |
| Pensioner <65 years of age | 3.8 | 1.6 | 2.8 | 2.01 | 2.2 |
| Pensioner ≥65 years of age | - | 20.8 | 70.9 | 37.8 | 36.4 |
| Student | - | 9.4 | - ¶ | 2.8 | 6.4 |
| No occupation | 7.7 | 0.1 | - ¶ | 0.1 | - ¶ |
| No information/no income | 8.3 | 8.8 | 2.2 | 5.5 | - ¶ |
| Missing | - | 0.1 | 0.01 | 0.02 | <0.01 |
| Household income (€)Ⅎ | | 23,300 | 39,493 (28.550) | 24,000 (15,903) | 29,468 (21,411) | 33,604 (25,250) |
| Household type• | One-person household | 34.8 | 24.8 | 53.4 | 42.1 | 33.5 |
| Unmarried couples, no children | 6.7 | 4.7 | 3.1 | 4.5 | 4.2 |
| Unmarried couples, with child(ren) | 4.2 | 5.4 | 1.1 | 3.6 | 4.0 |
| Maried couples, no children | 21.4 | 13.4 | 30.1 | 17.5 | 19.6 |
| Maried couples, with child(ren) | 23.1 | 39.1 | 6.3 | 20.9 | 28.5 |
| Single parent household | 6.3 | 10.5 | 3.7 | 8.2 | 8.7 |
| Persons in institutional households | 2.8 | 1.4 | 1.9 | 2.7 | 1.2 |
| Other | 0.7 | 0.7 | 0.5 | 0.5 | 0.5 |

†Mental health disease: People who used calming and arousing drugs to treat mental health problems

‡Source: https://opendata.cbs.nl/statline/#/CBS/nl/dataset/37296ned/table?dl=8EA6

§For the whole NL population, these numbers only cover people between 15 and 65 years of age (working population). Besides, some subcategories, such as students, were not specified in this dataset. Source: https://opendata.cbs.nl/statline/#/CBS/nl/dataset/81208ned/table?dl=8EAD

¶There are less than 10 people in this category. Statistics Netherlands policy dictates that any numbers obtained from less than 10 people should not be reported because of identifiability issues.

ℲAnnual household income; standardized for number and age of household members. Source:https://opendata.cbs.nl/statline/#/CBS/nl/dataset/70843ned/table?dl=8E73

•Sources: https://opendata.cbs.nl/statline/#/CBS/nl/dataset/71486ned/table?dl=8E77 and https://opendata.cbs.nl/statline/#/CBS/nl/dataset/37296ned/table?dl=8E79

## Appendix E: Random forest importance value & rank of neighborhood and socio-demographic variables in model 2 on GP consultation costs

## Appendix F: Random forest importance value &rank of neighborhood and socio-demographic variables in model 2 on Sum of ATC codes

## Appendix G: Random forest importance value & rank of neighborhood and socio-demographic variables in model 4 on GP consultation costs

## Appendix H: Random forest importance value & rank of neighborhood and socio-demographic variables in model 4 on Sum of ATC codes

## Appendix I: Random forest importance ranks of the quality of the neighbourhood (livability_pre) in model 4 on three outcomes in different subgroups

| Population | Importance rank livability_pre  Model 4 (261 variables) | | |
| --- | --- | --- | --- |
| Regular costs | GP consultation costs | Sum ATC codes |
| Whole study population | 73 | 81 | 70 |
| Diabetes type 2 | 142 | 95 | 159 |
| Mental health disease | 176 | 165 | 176 |
| Obstructive airway disease | 173 | 132 | 146 |

## Appendix J: Predictive performance of adding neighborhood to models on regular costs in different age and gender subpopulations

| Model | Prediction variables | R2 (%) | MAE† | MSE‡ | Prediction error (€) | | | |
| --- | --- | --- | --- | --- | --- | --- | --- | --- |
| mean | median | Percentiles | |
| 0.05 | 0.95 |
| Subpopulation age: <40 | | | | | | | | |
| Model 3 | Model 1 + prior expenditure and medication use | 39 | 0.78 | 0.97 | 502§ | -40 | -596 | 2757 |
| Model 4 | Model 3 + neighborhood (Full model) | 39 | 0.78 | 0.97 | 503 | -40 | -592 | 2753 |
| Subpopulation age: 40-64 | | | | | | | | |
| Model 3 | Model 1 + prior expenditure and medication use | 45 | 0.84 | 1.22 | 1111 | -70 | -1279 | 6678 |
| Model 4 | Model 3 + neighborhood (Full model) | 46 | 0.84 | 1.22 | 1115 | -70 | -1274 | 6647 |
| Subpopulation age: >64 | | | | | | | | |
| Model 3 | Model 1 + prior expenditure and medication use | 38 | 0.97 | 2.07 | 2281 | 2281 | -2380 | 12437 |
| Model 4 | Model 3 + neighborhood (Full model) | 38 | 0.97 | 2.06 | 2287 | 2287 | -2362 | 12429 |
| Subpopulation gender= male | | | | | | | | |
| Model 3 | Model 1 + prior expenditure and medication use | 50 | 0.81 | 1.20 | 934 | -38 | -958 | 5445 |
| Model 4 | Model 3 + neighborhood (Full model) | 50 | 0.81 | 1.20 | 936 | -38 | -958 | 5443 |
| Subpopulation gender= female | | | | | | | | |
| Model 3 | Model 1 + prior expenditure and medication use | 42 | 0.86 | 1.36 | 1170 | 11 | -1292 | 6826 |
| Model 4 | Model 3 + neighborhood (Full model) | 42 | 0.86 | 1.36 | 1174 | 13 | -1286 | 6832 |

†MAE = Mean Absolute prediction error (on log-scale) = mean(|ln(actual costs in Euros) – ln(predicted costs in Euros)|)

‡MSE = Mean Squared prediction Error (on log-scale) = mean(ln(actual costs in Euros) – ln(predicted cost in Euros))2

§Reading example: In model 3. exclusively on people aged 40 years and younger. average prediction error was €502.29

## Appendix K: Prediction error (€) of models on the study population presented per category of individual characteristics (of the year 2009)

| Subgroup | | % | True average annual costs in the years 2011 to 2014 (€) | | Prediction error (€)† | | | | Difference in prediction error between model 3 and 4 (i.e. additional compensation; €) | |
| --- | --- | --- | --- | --- | --- | --- | --- | --- | --- | --- |
| Model 3 | | Model 4 | |
| Mean | Median | Mean | Median | Mean | Median | Mean | Median |
| Gender | Men | 48 | 1972 | 411 | 940 | -44 | 943 | -45 | 3 | -1 |
| Women | 52 | 2773 | 1181 | 1149 | 15 | 1151 | 15 | 2 | 0 |
| Age‡ | Young childhood and young adult <40 | 53 | 1137 | 399 | 505§ | -40 | 506 | -42 | 1 | -2 |
| Middle-aged 40-65 | 25 | 2494 | 806 | 1154 | -62 | 1157 | -59 | 3 | 3 |
| Elderly >65 | 22 | 5305 | 3134 | 2250 | 335 | 2255 | 340 | 5 | 5 |
| Ethnic background | Native Dutch | 83 | 2450 | 727 | 1084 | -24 | 1086 | -25 | 2 | -1 |
| 1st generation non-native | 7 | 2509 | 835 | 1034 | -58 | 1035 | -57 | 1 | 1 |
| 2nd generation non-native | 10 | 1749 | 511 | 757 | -34 | 758 | -34 | 1 | 0 |
| Household income | <€20.675 | 25 | 3753 | 1579 | 1614 | 36 | 1616 | 40 | 2 | 4 |
| 20.675-34.519 | 25 | 2871 | 926 | 1248 | -24 | 1252 | -25 | 4 | -1 |
| 34.520-52.625 | 25 | 1675 | 517 | 767 | -37 | 769 | -39 | 2 | -2 |
| >52.625 | 25 | 1250 | 402 | 565 | -44 | 566 | -45 | 1 | -1 |
| Occupation | Employed | 52 | 1392 | 459 | 634 | -46 | 636 | -47 | 2 | -1 |
| Recipient of benefits | 8 | 3833 | 1453 | 1811 | 47 | 1818 | 58 | 7 | 11 |
| Pensioner. student. no occupation/income | 41 | 3384 | 1194 | 1433 | 6 | 1435 | 4 | 2 | -2 |
| Health status | Obstructive airway disease | 10 | 4855 | 2216 | 1917 | 88 | 1928 | 93 | 11 | 5 |
| Diabetes type II | 5 | 6684 | 4249 | 2588 | 409 | 2600 | 436 | 12 | 27 |
| Mental health disease | 10 | 4430 | 2136 | 1773 | 82 | 1772 | 82 | -1 | 0 |
| Multimorbidity¶ | 0 ATC codes | 24 | 808 | 246 | 449 | -40 | 449 | -42 | 0 | -2 |
| 1 ATC code | 18 | 1133 | 390 | 572 | -52 | 573 | -53 | 1 | -1 |
| 2 or more ATC codes | 58 | 3440 | 1455 | 1449 | 17 | 1452 | 19 | 3 | 2 |
| Health care utilization | GP care in previous year | 83 | 2702 | 924 | 1163 | -16 | 1166 | -17 | 3 | -1 |
| Specialist care in previous year• | 58 | 3363 | 1343 | 1442 | 27 | 1446 | 28 | 4 | 1 |
| Mental healthcare (in- /outpatient) | 6 | 3003 | 1147 | 1249 | -26 | 1249 | -18 | 0 | 8 |
| Previous 2 years expen-ditures in top 25%Ⅎ | Yes | 16 | 6849 | 4110 | 2856 | 512 | 2864 | 529 | 8 | 17 |
| No | 84 | 1591 | 541 | 721 | -43 | 722 | -45 | 1 | -2 |

†Prediction Error = mean/median of the prediction error (i.e. actual costs – predicted cost); in Euros for regular costs and GP consultation costs; in numbers for sum of ATC codes

‡Age categories were based on Berhanu Alemayehu and Kenneth E. Warner. 2004.

§Reading example: In model 3. performed on the complete study population. the average prediction error was €505 for those aged 40 years and younger.

¶Multimorbidity is measured with prescribed medication. summarized in ATC code categories. We were not able to differentiate between someone with missing values and someone with no prescribed medication. Hence. we might underestimate the number of people with multimorbidity.

•In 2009. 42% of the study population had zero expenditure for specialist care. 56% had zero or less than €150 expenditures for specialist care. Health care expenditures lower than €150 might indicate that a consult in specialist care in 2009 has taken place. however. we cannot be sure. An alternative explanation for these low costs is ‘overhead costs’ which might have been booked on a person without delivering care.

ℲTotal costs. 75 percentile in 2008 = €1769. in 2009 = €1911.

## Appendix L: Importance rank & value of all variables included in model 2 and 4

| Model 2 on regular costs | | | Model 4 on regular costs | | |
| --- | --- | --- | --- | --- | --- |
| Variable | Importance | | Variable | Importance | |
| Rank | Value† | Rank | Value† |
| Sex_at_move | 1 | 208.0 | Sex_at_move | 1 | 70.6 |
| Household_asset_percentile_08 | 2 | 77.3 | Age_at_move | 2 | 69.0 |
| Household_income_10 | 3 | 77.0 | Household_income_10 | 3 | 64.0 |
| Household_asset_percentile_09 | 4 | 74.6 | AUC_income_pre‡ | 4 | 59.9 |
| Household_asset_percentile_06 | 5 | 72.5 | Medical_cost_10 | 5 | 56.5 |
| Household_income_05 | 6 | 72.2 | Household_asset_percentile_08 | 6 | 56.2 |
| Household_income_06 | 7 | 70.0 | Household_income_06 | 7 | 56.0 |
| Household_asset_percentile_07 | 8 | 68.6 | Household_asset_percentile_07 | 8 | 55.8 |
| Household_income_03 | 9 | 65.2 | Household_income_08 | 9 | 55.5 |
| Occupation_10 | 10 | 64.4 | Household_income_05 | 10 | 55.1 |
| Livability_08_pre | 11 | 62.1 | GP_consultation_cost_10 | 11 | 53.2 |
| Age_at_move | 12 | 61.8 | Household_income_07 | 12 | 53.1 |
| Livability_08_post | 13 | 61.2 | Household_type_10 | 13 | 51.8 |
| Position_in_Household_10 | 14 | 60.0 | Value_of_house_09 | 14 | 51.8 |
| AUC_income_pre‡ | 15 | 58.7 | GP_consultation_cost_08 | 15 | 51.3 |
| Occupation_09 | 16 | 58.3 | Household_asset_percentile_06 | 16 | 51.3 |
| Household_income_04 | 17 | 55.8 | Value_of_house_07 | 17 | 49.5 |
| Household_income_08 | 18 | 55.3 | Position_in_Household_10 | 18 | 48.4 |
| Household_type_10 | 19 | 53.7 | Household_income_04 | 19 | 48.3 |
| Household_income_09 | 20 | 52.9 | Medical_aids_costs_10 | 20 | 48.2 |
| Value_of_house_08 | 21 | 50.6 | Household_income_09 | 21 | 48.0 |
| Value_of_house_09 | 22 | 49.4 | Value_of_house_06 | 22 | 47.8 |
| Household_income_07 | 23 | 48.4 | Household_asset_percentile_09 | 23 | 47.4 |
| y_coord_pre | 24 | 46.3 | Household_income_03 | 24 | 46.8 |
| y_coord_post | 25 | 45.4 | Value_of_house_08 | 25 | 45.8 |
| Improvement_in_move | 26 | 44.0 | Primary_maternity_care_cost_10 | 26 | 44.4 |
| x_coord_post | 27 | 41.6 | Occupation_10 | 27 | 44.3 |
| Occupation_06 | 28 | 41.2 | Married_10 | 28 | 43.6 |
| Distance_moved | 29 | 41.1 | Specialist_care_cost_10 | 29 | 42.4 |
| x_coord_pre | 30 | 41.1 | Medical_aids_costs_08 | 30 | 40.6 |
| Occupation_04 | 31 | 40.1 | GP_consultation_cost_09 | 31 | 38.9 |
| Value_of_house_06 | 32 | 39.3 | Medical_cost_08 | 32 | 38.6 |
| Household_asset_percentile_10 | 33 | 39.0 | Household_asset_percentile_10 | 33 | 38.2 |
| Ethnic_background | 34 | 38.1 | Occupation_09 | 34 | 37.9 |
| Occupation_08 | 35 | 37.5 | AUC_cost_regular_healthcare_pre‡ | 35 | 37.5 |
| Occupation_05 | 36 | 36.4 | Occupation_06 | 36 | 37.1 |
| Changes_in_children | 37 | 35.7 | SUM_ATC4_10 | 37 | 36.5 |
| Value_of_house_07 | 38 | 35.3 | Total_cost_10 | 38 | 35.8 |
| Married_10 | 39 | 34.2 | Medical_cost_09 | 39 | 35.8 |
| Occupation_03 | 40 | 33.8 | Position_in_Household_09 | 40 | 35.6 |
| Non_mortgage_debt_07 | 41 | 31.3 | Occupation_04 | 41 | 35.6 |
| Household_type_09 | 42 | 31.1 | Occupation_07 | 42 | 35.3 |
| Non_mortgage_debt_08 | 43 | 30.9 | AUC_SUM_ATC4_pre‡ | 43 | 35.0 |
| Household_type_03 | 44 | 30.6 | Other_GP_cost_08 | 44 | 35.0 |
| Non_mortgage_debt_06 | 45 | 30.5 | Position_in_Household_08 | 45 | 34.3 |
| Position_in_Household_03 | 46 | 29.8 | Position_in_Household_03 | 46 | 34.1 |
| Position_in_Household_09 | 47 | 29.7 | ATC_G_08 | 47 | 33.9 |
| Non_mortgage_debt_09 | 48 | 29.5 | Specialist_care_cost_09 | 48 | 33.6 |
| Change_in_occupation | 49 | 28.8 | Household_type_09 | 49 | 33.6 |
| Rental_house_03 | 50 | 27.9 | Position_in_Household_07 | 50 | 33.5 |
| Rental_house_04 | 51 | 27.9 | Medical_aids_costs_09 | 51 | 33.3 |
| Occupation_07 | 52 | 27.9 | SUM_ATC4_07 | 52 | 33.2 |
| Rental_house_10 | 53 | 27.7 | Other_GP_cost_10 | 53 | 33.2 |
| Value_of_house_10 | 54 | 27.2 | SUM_ATC4_06 | 54 | 32.9 |
| Direction_of_move | 55 | 26.7 | Total_cost_09 | 55 | 31.6 |
| Increase_in_children | 56 | 26.0 | AUC_SUM_ATCmental_pre‡ | 56 | 31.5 |
| Position_in_Household_07 | 57 | 25.9 | Position_in_Household_06 | 57 | 31.4 |
| Rental_house_05 | 58 | 25.6 | ATC_G_09 | 58 | 30.9 |
| Household_type_04 | 59 | 25.0 | Occupation_05 | 59 | 30.7 |
| Household_type_08 | 60 | 24.8 | Value_of_house_10 | 60 | 30.1 |
| Household_type_06 | 61 | 24.4 | Specialist_care_cost_08 | 61 | 29.9 |
| Position_in_Household_08 | 62 | 24.3 | Occupation_03 | 62 | 29.8 |
| Position_in_Household_04 | 63 | 24.2 | ATC_G_06 | 63 | 29.7 |
| Position_in_Household_05 | 64 | 23.3 | Position_in_Household_05 | 64 | 29.6 |
| Rental_house_07 | 65 | 23.2 | Household_type_06 | 65 | 29.4 |
| Rental_house_08 | 66 | 23.1 | Total_cost_08 | 66 | 29.3 |
| Household_type_07 | 67 | 22.8 | Other_GP_cost_09 | 67 | 28.8 |
| Rental_house_06 | 68 | 22.5 | SUM_ATC4_09 | 68 | 28.6 |
| Household_type_05 | 69 | 22.3 | Occupation_08 | 69 | 28.5 |
| Position_in_Household_06 | 70 | 22.2 | ATC_G_10 | 70 | 28.5 |
| Children_09 | 71 | 20.8 | Position_in_Household_04 | 71 | 28.2 |
| Children_10 | 72 | 19.8 | AUC_SUM_R03_pre‡ | 72 | 28.1 |
| Non_mortgage_debt_10 | 73 | 18.7 | Livability_08_pre | 73 | 27.9 |
| Children_08 | 74 | 18.3 | Livability_08_post | 74 | 27.3 |
| Moved_within_neighborhood | 75 | 17.8 | Dentalcare_cost_09 | 75 | 26.8 |
| Marital_status_10 | 76 | 17.3 | Mental_healthcare_cost_08 | 76 | 26.5 |
| Married_08 | 77 | 16.9 | SUM_ATC4_08 | 77 | 26.5 |
| Children_06 | 78 | 16.9 | Household_type_07 | 78 | 26.3 |
| Rental_house_09 | 79 | 15.2 | Mental_healthcare_cost_09 | 79 | 26.3 |
| Children_03 | 80 | 15.1 | Household_type_04 | 80 | 25.8 |
| Children_04 | 81 | 13.9 | Changes_in_children | 81 | 25.7 |
| Married_09 | 82 | 13.8 | Marital_status_10 | 82 | 25.6 |
| Children_07 | 83 | 13.6 | Rental_house_10 | 83 | 25.0 |
| Divorced_04 | 84 | 13.2 | x_coord_post | 84 | 25.0 |
| Children_05 | 85 | 13.1 | x_coord_pre | 85 | 25.0 |
| Marital_status_08 | 86 | 12.9 | y_coord_pre | 86 | 25.0 |
| Marital_status_09 | 87 | 12.7 | ATC_C_06 | 87 | 24.9 |
| Married_07 | 88 | 12.2 | Household_type_03 | 88 | 24.8 |
| Marital_status_03 | 89 | 12.1 | ATC_G_07 | 89 | 24.8 |
| Became_widowed | 90 | 12.1 | ATC_N_06 | 90 | 24.6 |
| New_child_10 | 91 | 11.8 | Non_mortgage_debt_10 | 91 | 24.5 |
| HH_is_nursing_home_elderly_03 | 92 | 11.7 | Dentalcare_cost_10 | 92 | 24.5 |
| Divorced_09 | 93 | 11.6 | ATC_N_08 | 93 | 24.2 |
| HH_is_nursing_home_elderly_04 | 94 | 11.5 | Household_type_08 | 94 | 24.2 |
| Married_03 | 95 | 11.2 | Allied_care_cost_10 | 95 | 24.2 |
| Divorced_10 | 96 | 11.0 | AUC_total_cost_pre‡ | 96 | 24.1 |
| Divorced_05 | 97 | 10.8 | Rental_house_03 | 97 | 23.9 |
| Marital_status_06 | 98 | 10.7 | y_coord_post | 98 | 23.9 |
| Marital_status_04 | 99 | 10.7 | Distance_moved | 99 | 23.6 |
| Marital_status_05 | 100 | 10.5 | Mental_healthcare_cost_10 | 100 | 23.4 |
| HH_is_nursing_home_elderly_05 | 101 | 10.4 | Rental_house_04 | 101 | 23.3 |
| Divorced_08 | 102 | 10.3 | Household_type_05 | 102 | 23.2 |
| Became_divorced | 103 | 10.3 | Rental_house_05 | 103 | 22.9 |
| Divorced_06 | 104 | 10.0 | ATC_A_06 | 104 | 22.8 |
| Marital_status_07 | 105 | 9.9 | ATC_A_07 | 105 | 22.2 |
| Was_divorced | 106 | 9.8 | ATC_C_10 | 106 | 22.1 |
| Married_06 | 107 | 9.5 | Rental_house_09 | 107 | 22.0 |
| Divorced_07 | 108 | 9.2 | Dentalcare_cost_08 | 108 | 21.9 |
| Was_widowed | 109 | 8.9 | Rental_house_07 | 109 | 21.3 |
| HH_is_nursing_home_elderly_09 | 110 | 8.4 | Rental_house_08 | 110 | 20.9 |
| HH_is_nursing_home_elderly_07 | 111 | 8.0 | ATC_C_07 | 111 | 20.6 |
| Married_05 | 112 | 7.9 | Married_09 | 112 | 20.2 |
| HH_is_nursing_home_elderly_08 | 113 | 7.9 | Married_08 | 113 | 19.9 |
| Divorced_03 | 114 | 7.9 | ATC_C_08 | 114 | 19.7 |
| New_child_08 | 115 | 7.5 | ATC_R_06 | 115 | 19.6 |
| Married_04 | 116 | 6.3 | ATC_B_06 | 116 | 19.5 |
| New_child_05 | 117 | 5.5 | ATC_R_07 | 117 | 19.5 |
| HH_is_nursing_home_elderly_06 | 118 | 5.4 | ATC_R_08 | 118 | 19.2 |
| New_child_09 | 119 | 5.2 | ATC_J_10 | 119 | 19.2 |
| New_child_03 | 120 | 5.2 | Marital_status_08 | 120 | 19.1 |
| Pre_house_demolished | 121 | 4.2 | Non_mortgage_debt_06 | 121 | 18.8 |
| New_child_06 | 122 | 3.0 | Rental_house_06 | 122 | 18.5 |
| New_child_04 | 123 | 0.3 | Improvement_in_move | 123 | 18.4 |
| New_child_07 | 124 | -0.4 | ATC_J_06 | 124 | 18.4 |
| HH_is_nursing_home_elderly_10 | 125 | -1.1 | ATC_M_10 | 125 | 18.2 |
| Decrease_in_children | 126 | -15.7 | Marital_status_06 | 126 | 18.2 |
|  |  |  | Children_05 | 127 | 18.1 |
|  |  |  | ATC_A_08 | 128 | 18.1 |
|  |  |  | ATC_B_07 | 129 | 18.0 |
|  |  |  | Non_mortgage_debt_07 | 130 | 18.0 |
|  |  |  | ATC_L_10 | 131 | 17.8 |
|  |  |  | ATC_N_10 | 132 | 17.7 |
|  |  |  | Children_08 | 133 | 17.7 |
|  |  |  | ATC_A_10 | 134 | 17.6 |
|  |  |  | ATC_N05B_N05C_N06A_N06B_08 | 135 | 17.5 |
|  |  |  | Children_06 | 136 | 17.3 |
|  |  |  | Children_04 | 137 | 17.3 |
|  |  |  | ATC_M_08 | 138 | 17.2 |
|  |  |  | ATC_R03_06 | 139 | 17.2 |
|  |  |  | ATC_R_10 | 140 | 17.1 |
|  |  |  | Children_09 | 141 | 17.1 |
|  |  |  | ATC_M_07 | 142 | 17.1 |
|  |  |  | ATC_C_09 | 143 | 17.1 |
|  |  |  | Children_03 | 144 | 17.0 |
|  |  |  | ATC_A_09 | 145 | 17.0 |
|  |  |  | ATC_M_06 | 146 | 17.0 |
|  |  |  | ATC_B_10 | 147 | 16.9 |
|  |  |  | ATC_B_09 | 148 | 16.8 |
|  |  |  | ATC_N05B_N05C_N06A_N06B_07 | 149 | 16.7 |
|  |  |  | Marital_status_03 | 150 | 16.7 |
|  |  |  | ATC_J_08 | 151 | 16.6 |
|  |  |  | Non_mortgage_debt_08 | 152 | 16.6 |
|  |  |  | Marital_status_09 | 153 | 16.5 |
|  |  |  | AUC_SUM_A10B_pre‡ | 154 | 16.3 |
|  |  |  | ATC_B_08 | 155 | 16.2 |
|  |  |  | Marital_status_07 | 156 | 15.8 |
|  |  |  | Non_mortgage_debt_09 | 157 | 15.8 |
|  |  |  | Change_in_occupation | 158 | 15.7 |
|  |  |  | ATC_N05B_N05C_N06A_N06B_06 | 159 | 15.6 |
|  |  |  | ATC_R_09 | 160 | 15.4 |
|  |  |  | ATC_J_07 | 161 | 15.4 |
|  |  |  | Marital_status_04 | 162 | 15.3 |
|  |  |  | Was_widowed | 163 | 15.2 |
|  |  |  | Ethnic_background | 164 | 15.0 |
|  |  |  | Children_10 | 165 | 14.8 |
|  |  |  | ATC_N_07 | 166 | 14.7 |
|  |  |  | Marital_status_05 | 167 | 14.7 |
|  |  |  | ATC_N_09 | 168 | 14.7 |
|  |  |  | ATC_D_10 | 169 | 14.6 |
|  |  |  | ATC_J_09 | 170 | 14.3 |
|  |  |  | ATC_R03_08 | 171 | 14.2 |
|  |  |  | Increase_in_children | 172 | 13.9 |
|  |  |  | ATC_R03_10 | 173 | 13.9 |
|  |  |  | Married_07 | 174 | 13.9 |
|  |  |  | Married_06 | 175 | 13.6 |
|  |  |  | ATC_M_09 | 176 | 13.5 |
|  |  |  | Divorced_10 | 177 | 13.4 |
|  |  |  | ATC_N05B_N05C_N06A_N06B_10 | 178 | 13.3 |
|  |  |  | ATC_R03_07 | 179 | 13.2 |
|  |  |  | Married_03 | 180 | 13.1 |
|  |  |  | Health_transport_sede_cost_10 | 181 | 13.0 |
|  |  |  | Children_07 | 182 | 13.0 |
|  |  |  | ATC_H_10 | 183 | 12.6 |
|  |  |  | ATC_R03_09 | 184 | 12.5 |
|  |  |  | Married_04 | 185 | 12.2 |
|  |  |  | HH_is_nursing_home_elderly_04 | 186 | 11.9 |
|  |  |  | Direction_of_move | 187 | 11.7 |
|  |  |  | ATC_D_09 | 188 | 11.3 |
|  |  |  | Allied_care_cost_09 | 189 | 11.1 |
|  |  |  | Was_divorced | 190 | 11.0 |
|  |  |  | Married_05 | 191 | 10.9 |
|  |  |  | ATC_S_10 | 192 | 10.9 |
|  |  |  | HH_is_nursing_home_elderly_06 | 193 | 10.3 |
|  |  |  | Health_care_abroad_cost_10 | 194 | 10.2 |
|  |  |  | Divorced_09 | 195 | 10.1 |
|  |  |  | Allied_care_cost_08 | 196 | 10.1 |
|  |  |  | ATC_L_07 | 197 | 10.0 |
|  |  |  | ATC_H_07 | 198 | 10.0 |
|  |  |  | Divorced_06 | 199 | 10.0 |
|  |  |  | ATC_A10B_09 | 200 | 9.8 |
|  |  |  | ATC_A10B_10 | 201 | 9.7 |
|  |  |  | ATC_L_08 | 202 | 9.5 |
|  |  |  | HH_is_nursing_home_elderly_03 | 203 | 9.5 |
|  |  |  | ATC_H_06 | 204 | 9.4 |
|  |  |  | Health_care_abroad_cost_08 | 205 | 9.4 |
|  |  |  | ATC_A10B_06 | 206 | 9.3 |
|  |  |  | Divorced_04 | 207 | 9.2 |
|  |  |  | ATC_H_08 | 208 | 9.2 |
|  |  |  | ATC_L_09 | 209 | 9.2 |
|  |  |  | Primary_maternity_care_cost_08 | 210 | 9.2 |
|  |  |  | Divorced_08 | 211 | 9.2 |
|  |  |  | Moved_within_neighborhood | 212 | 9.2 |
|  |  |  | Divorced_07 | 213 | 9.1 |
|  |  |  | ATC_V_10 | 214 | 8.9 |
|  |  |  | Health_transport_horiz_cost_09 | 215 | 8.9 |
|  |  |  | Divorced_05 | 216 | 8.8 |
|  |  |  | Health_transport_horiz_cost_10 | 217 | 8.7 |
|  |  |  | ATC_A10B_07 | 218 | 8.6 |
|  |  |  | Health_transport_sede_cost_08 | 219 | 8.6 |
|  |  |  | HH_is_nursing_home_elderly_08 | 220 | 8.5 |
|  |  |  | Primary_maternity_care_cost_09 | 221 | 8.4 |
|  |  |  | Became_widowed | 222 | 8.4 |
|  |  |  | ATC_A10B_08 | 223 | 8.4 |
|  |  |  | HH_is_nursing_home_elderly_07 | 224 | 8.3 |
|  |  |  | Became_divorced | 225 | 8.3 |
|  |  |  | ATC_N05B_N05C_N06A_N06B_09 | 226 | 8.2 |
|  |  |  | ATC_D_06 | 227 | 8.1 |
|  |  |  | ATC_D_07 | 228 | 7.9 |
|  |  |  | Divorced_03 | 229 | 7.8 |
|  |  |  | ATC_D_08 | 230 | 7.7 |
|  |  |  | HH_is_nursing_home_elderly_05 | 231 | 7.4 |
|  |  |  | ATC_S_08 | 232 | 6.9 |
|  |  |  | Health_transport_horiz_cost_08 | 233 | 6.9 |
|  |  |  | HH_is_nursing_home_elderly_09 | 234 | 6.4 |
|  |  |  | ATC_V_09 | 235 | 6.0 |
|  |  |  | ATC_S_07 | 236 | 5.8 |
|  |  |  | ATC_L_06 | 237 | 5.7 |
|  |  |  | Health_transport_sede_cost_09 | 238 | 5.6 |
|  |  |  | ATC_V_08 | 239 | 5.3 |
|  |  |  | ATC_H_09 | 240 | 4.9 |
|  |  |  | New_child_10 | 241 | 4.5 |
|  |  |  | ATC_S_06 | 242 | 3.9 |
|  |  |  | ATC_P_10 | 243 | 3.9 |
|  |  |  | New_child_03 | 244 | 3.9 |
|  |  |  | New_child_05 | 245 | 3.5 |
|  |  |  | New_child_09 | 246 | 3.3 |
|  |  |  | ATC_S_09 | 247 | 3.2 |
|  |  |  | ATC_P_06 | 248 | 2.7 |
|  |  |  | New_child_06 | 249 | 2.1 |
|  |  |  | Health_care_abroad_cost_09 | 250 | 2.1 |
|  |  |  | ATC_V_06 | 251 | 1.8 |
|  |  |  | ATC_P_08 | 252 | 1.5 |
|  |  |  | New_child_08 | 253 | 1.3 |
|  |  |  | HH_is_nursing_home_elderly_10 | 254 | 1.0 |
|  |  |  | Pre_house_demolished | 255 | 0.9 |
|  |  |  | ATC_V_07 | 256 | 0.5 |
|  |  |  | ATC_P_09 | 257 | 0.5 |
|  |  |  | ATC_P_07 | 258 | 0.4 |
|  |  |  | New_child_07 | 259 | -0.4 |
|  |  |  | New_child_04 | 260 | -1.5 |
|  |  |  | Decrease_in_children | 261 | -5.3 |

† The importance of a variable is expressed in a terms of statistical measure of *how worse* the accuracy of the model gets when in place of the actual value of that variable the model is given a *random value* picked from the data. For example, if variable A has an importance value of 50 and variable B has an importance value of 25, this means that variable A is twice as important as variable B in the sense that ‘tricking the model’ about the value of A makes the model twice as inaccurate as ‘tricking the model’ about the value of B. Since a variable may become more or less important depending on the accompanying variables, variable importance is *relative*, namely relative to which and how many other variables are included in the model. In general, therefore, comparisons between the relative importance of predictor variables make sense only within the same model. Thus direct comparison of variable importance in models 2 and 4 is not meaningful. On the other hand, for example the fact that a certain variable is ranked high – or more specifically ranked 3rd, or ranked in the top 20% - in both models *is* obviously meaningful.

‡AUC= Area Under the Curve
